# Supplementary material for: Sustainable Electrochemical Activation of Self-Generated Persulfate for the Degradation of Endocrine Disruptors: Kinetics, Performances, and Mechanisms
Source: MDPI journal article supplement (doi:10.3390/toxics12020156), 2024-02-17
Supplement: s1 [file s1]

**Sustainable Electrochemical Activation of Self-Generated Persulfate  
for the Degradation of Endocrine Disruptors: Kinetics, Performances,  
and Mechanisms**

*Xiaofeng Tang<sup>1</sup>, Zhiquan Jin<sup>1</sup>, Rui Zou<sup>1</sup>, Yi Zhu<sup>1</sup>, Xia Yao<sup>1</sup>, Mengxuan Li<sup>1</sup>, Shuang  
Song<sup>1</sup>, Shuangliu Liu<sup>2,\*</sup>, Tao Zeng<sup>1,3,\*</sup>*

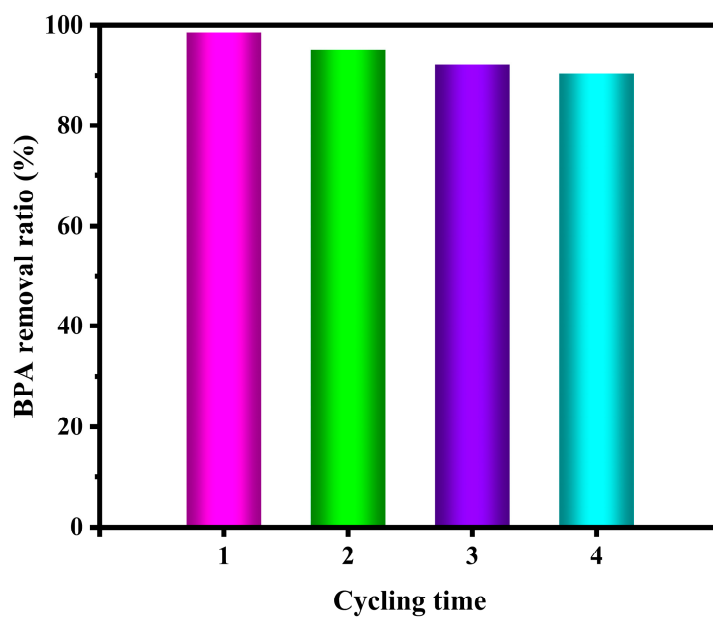

**Figure S1.** Cycling test for the degradation of BPA in BDD and ACF system.

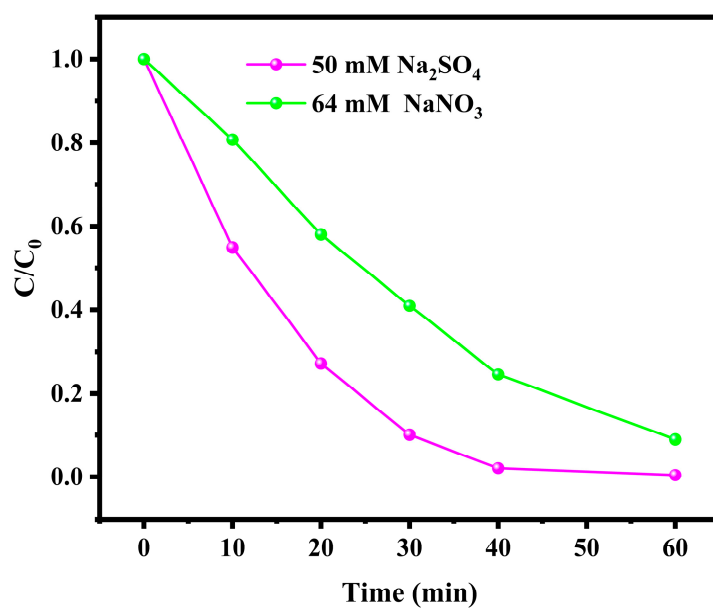

**Figure S2.** The degradation of BPA in BDD and ACF system with  $\text{NaSO}_4/\text{NaNO}_3$  as the electrolyte with a same conductivity of  $5.9 \text{ mS/cm}^2$ .

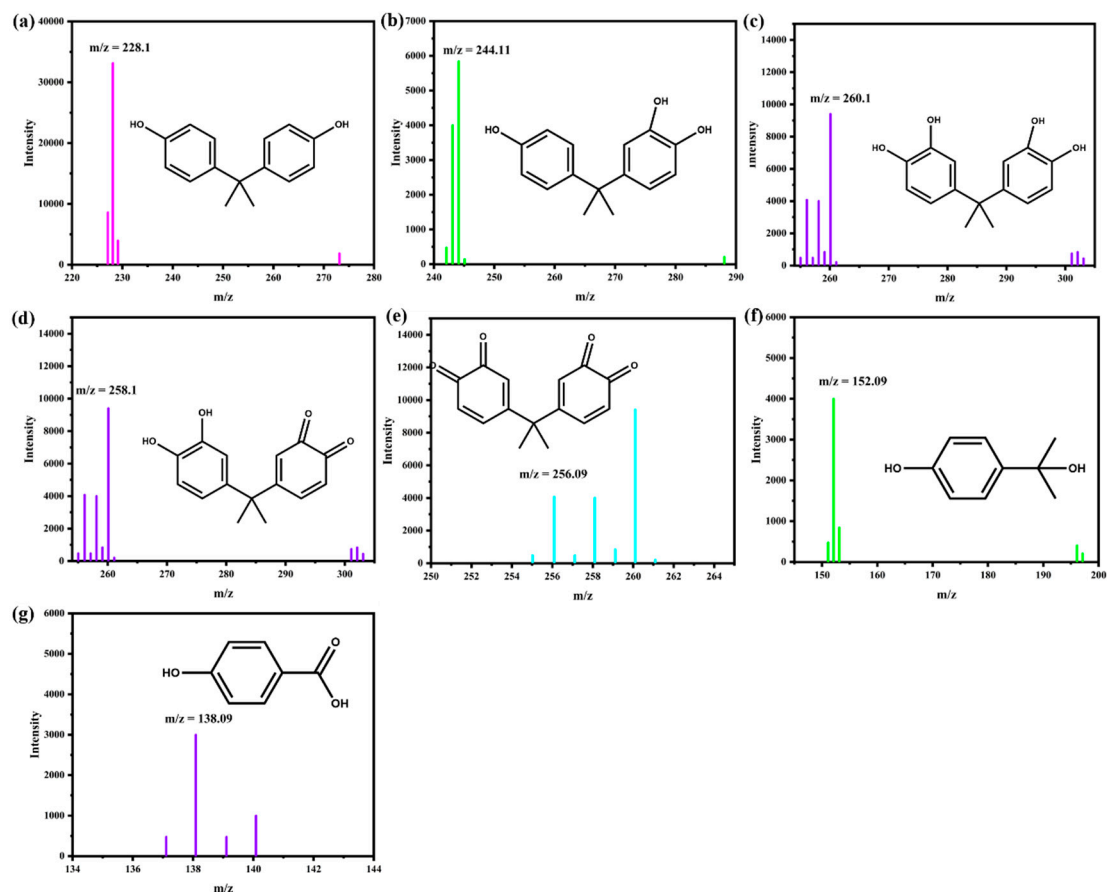

**Figure S3.** BPA degradation intermediates detected in the BDD and ACF system.

**Table S1.** The energy consumption of different electro-catalytic system.

| Reaction system                   | Current density<br>(mA·cm <sup>-2</sup> ) | Average voltage<br>(V) | The energy consumption<br>(kWh·m <sup>-3</sup> ) |
|-----------------------------------|-------------------------------------------|------------------------|--------------------------------------------------|
| Undivided cell                    | 5                                         | 4.3                    | 0.094                                            |
|                                   | 10                                        | 5.8                    | 0.19                                             |
|                                   | 15                                        | 7.2                    | 0.23                                             |
|                                   | 20                                        | 8.5                    | 0.28                                             |
|                                   | 25                                        | 9.8                    | 0.38                                             |
| Anode chamber of the divided cell | 15                                        | 25.8                   | 1.11                                             |

**Table S2.** Water quality parameters of the pure electrolyte solution, tap water and surface water.

| Constituent                          | Pure electrolyte solution | Tap water | Surface water |
|--------------------------------------|---------------------------|-----------|---------------|
| DOC (mg/L)                           | 0                         | 0.98      | 9.51          |
| CO <sub>3</sub> <sup>2-</sup> (mg/L) | -                         | 0.93      | 2.23          |
| HCO <sub>3</sub> <sup>-</sup> (mg/L) | -                         | 58        | 170           |
| Cl <sup>-</sup> (mg/L)               | -                         | 5.3       | 13.5          |
| SO <sub>4</sub> <sup>2-</sup> (mg/L) | 4800                      | 5098      | 5226          |
| PO <sub>4</sub> <sup>3-</sup> (mg/L) | -                         | 1.83      | 4.35          |
| NO <sub>3</sub> <sup>-</sup> (mg/L)  | -                         | 1.23      | 1.04          |
| Ammonia (mg-N/L)                     | -                         | -         | 3.56          |

**Table S3.** Toxicity classification according to the Globally Harmonized System of Classification and Labelling of Chemicals (GHS).

| Toxicity range (mg L <sup>-1</sup> )              | Class       |
|---------------------------------------------------|-------------|
| LC <sub>50</sub> /EC <sub>50</sub> /ChV ≤1        | Very toxic  |
| 1 < LC <sub>50</sub> /EC <sub>50</sub> /ChV ≤10   | Toxic       |
| 10 < LC <sub>50</sub> /EC <sub>50</sub> /ChV ≤100 | Harmful     |
| LC <sub>50</sub> /EC <sub>50</sub> /ChV >100      | Not harmful |

**Table S4.** Predicted acute and chronic toxicity of SMX and its products

| Compound | Acute toxicity (mg L <sup>-1</sup> ) |                                |                              | Chronic toxicity (ChV)<br>(mg L <sup>-1</sup> ) |         |         |
|----------|--------------------------------------|--------------------------------|------------------------------|-------------------------------------------------|---------|---------|
|          | Fish<br>(LC <sub>50</sub> )          | Daphnid<br>(LC <sub>50</sub> ) | Algae<br>(EC <sub>50</sub> ) | Fish                                            | Daphnid | Algae   |
| BPA      | 1.284                                | 5.237                          | 1.331                        | 0.550                                           | 1.773   | 0.227   |
| P1       | 2.655                                | 13.105                         | 2.070                        | 1.224                                           | 4.568   | 0.329   |
| P2       | 4.435                                | 24.998                         | 2.837                        | 2.152                                           | 8.892   | 0.429   |
| P3       | 5.466                                | 32.653                         | 3.205                        | 2.712                                           | 11.718  | 0.474   |
| P4       | 81.312                               | 48.173                         | 42.773                       | 8.356                                           | 5.287   | 12.313  |
| P5       | 67.265                               | 15.969                         | 77.359                       | 6.280                                           | 3.041   | 36.588  |
| P6       | 692.680                              | 159.249                        | 776.856                      | 63.989                                          | 30.325  | 367.767 |

 Not harmful
  Harmful
  Toxic
  Very toxic
